# Supplementary material
Source: PubMed Central journal article supplement (PMC4540184)
Supplement: NIHMS714641-supplement-supplemental_material.pdf [file NIHMS714641-supplement-supplemental_material.pdf]

Figure S1.

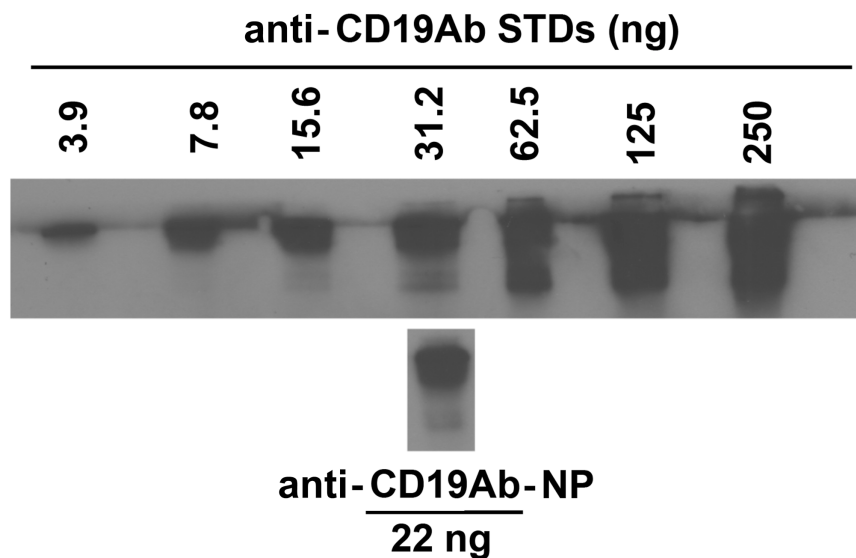

**Figure S1. A representative immunoblot used to quantify biotinylated anti-CD19Ab levels on NPs.**

**Figure S2.**

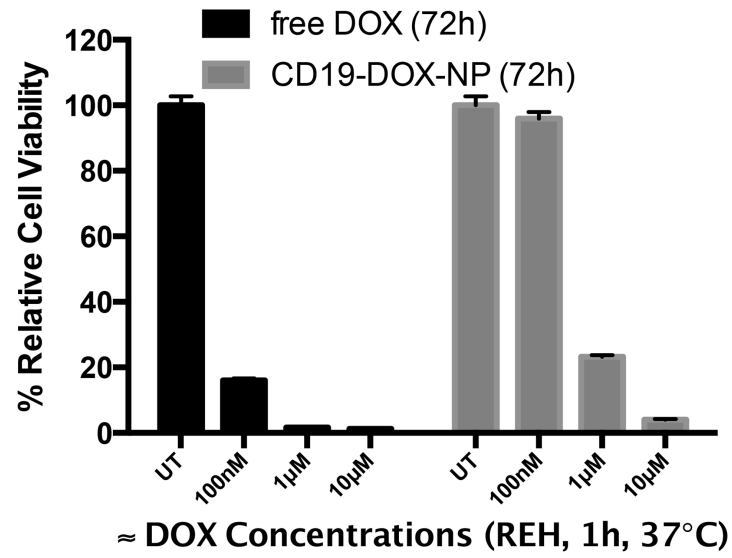

**Figure S2.** Treatment of REH cells with free DOX or CD19-DOX-NPs ( $\approx 100\text{nM}$ ,  $1\mu\text{M}$  or  $10\mu\text{M}$  DOX) for 1h at  $37^\circ\text{C}$ . CD19-DOX-NPs did not affect the cell viability at  $100\text{nM}$  DOX, but reduced the viability at higher concentrations of 1 and  $10\mu\text{M}$  DOX.

**Figure S3.**

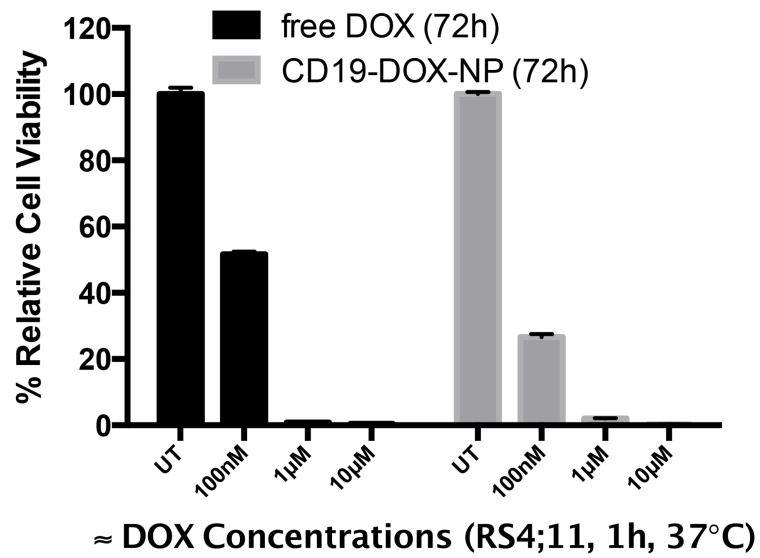

**Figure S3.** Treatment of RS4;11 cells with free DOX or CD19-DOX-NPs ( $\approx 100\text{nM}$ ,  $1\mu\text{M}$  or  $10\mu\text{M}$  DOX) for 1h at  $37^\circ\text{C}$ . CD19-DOX-NPs reduced the cell viability at all concentrations of DOX.

**Figure S4.**

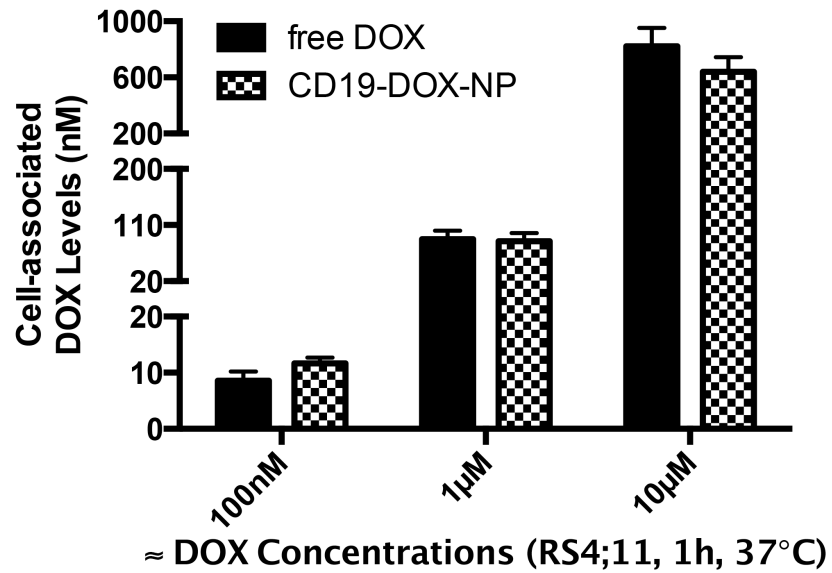

**Figure S4. CD19-targeting achieves similar cell associated DOX (intracellular and cell surface bound, caDOX) levels in RS4;11 cells:** RS4;11 caDOX levels on treatment with free DOX or CD19-DOX-NPs ( $\approx 100\text{nM}$ ,  $1\mu\text{M}$  or  $10\mu\text{M}$  DOX) for 1h at  $37^\circ\text{C}$ .

**Figure S5.**

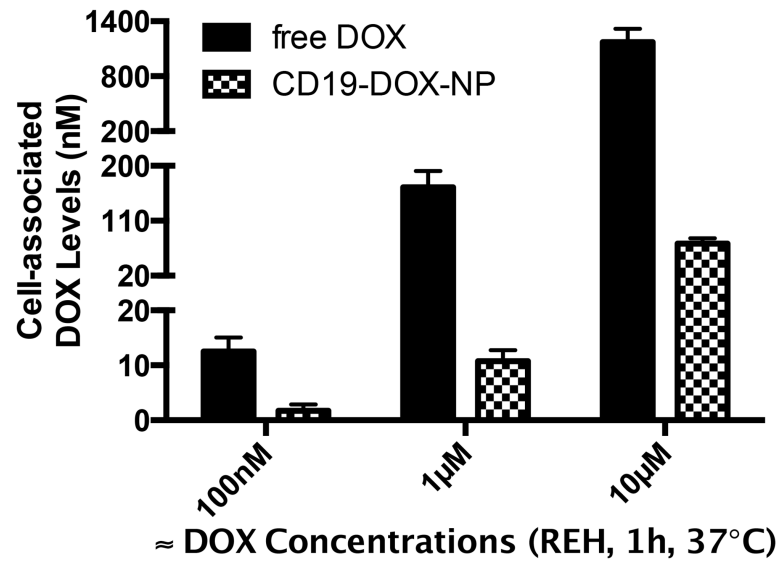

**Figure S5. CD19-targeting reduces the cell associated DOX (intracellular and cell surface bound, caDOX) levels in REH cells:** REH caDOX levels on treatment with free DOX or CD19-DOX-NPs ( $\approx 100\text{nM}$ ,  $1\mu\text{M}$  or  $10\mu\text{M}$  DOX) for 1h at  $37^\circ\text{C}$ .

**Figure S6.**

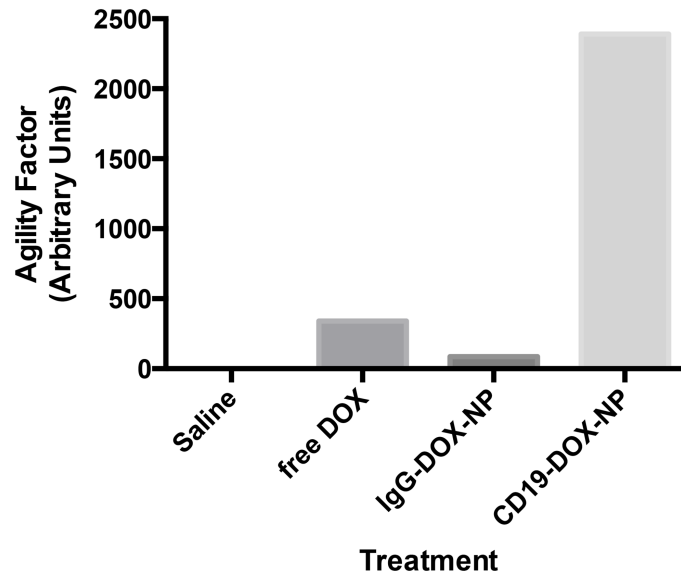

**Figure S6. CD19-DOX-NPs maintained high agility factor in leukemic mice:** Agility Factor (normalized to saline) = no. of wheel rotations on day 15  $\div$  no. of wheel rotations on day 1. CD19-DOX-NPs ( $\approx 2.5$  mg/kg DOX) maintained a high agility factor in comparison with groups treated with saline, IgG-DOX-NPs and free DOX ( $\approx 2.5$  mg/kg DOX). This indicates reduced apparent systemic toxicity in leukemic mice treated with CD19-DOX-NPs.
